# Supplementary material for: Performance of distinct microbial based solutions in a Campylobacter infection challenge model in poultry
Source: PubMed Central journal article supplement (PMC8722297; doi:10.1186/s42523-021-00157-6), 2022-01-03
Supplement: 42523_2021_157_MOESM12_ESM.pdf [file 42523_2021_157_MOESM12_ESM.pdf]

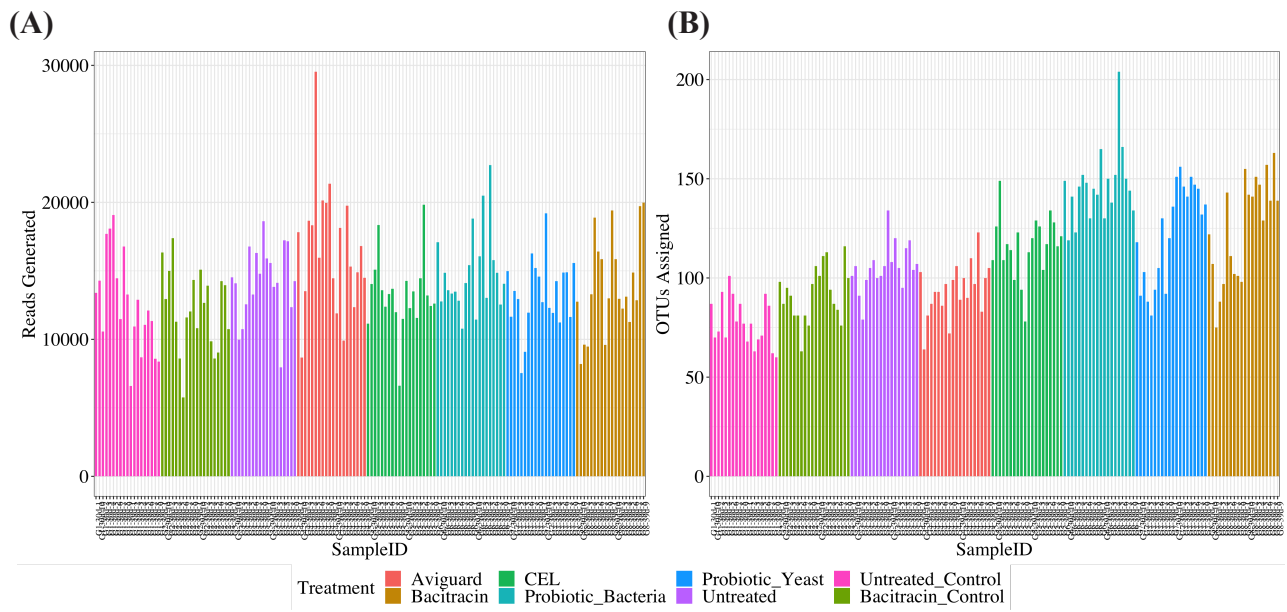

**Supplemental Figure 1**

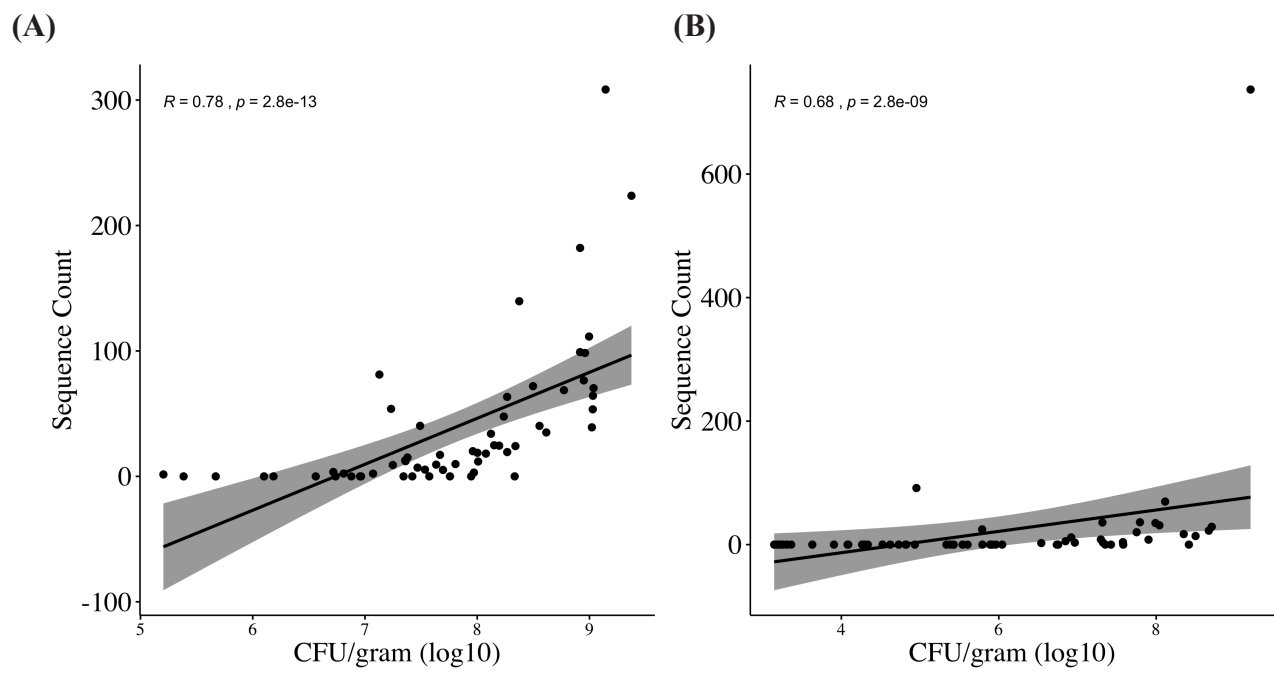

**Supplemental Figure 2**
