# Supplementary material for: Performance of distinct microbial based solutions in a Campylobacter infection challenge model in poultry
Source: PubMed Central journal article supplement (PMC8722297; doi:10.1186/s42523-021-00157-6), 2022-01-03
Supplement: 42523_2021_157_MOESM14_ESM.pdf [file 42523_2021_157_MOESM14_ESM.pdf]

**(A) Treated groups relative to the untreated group under *C. jejuni* challenge at 30 days**

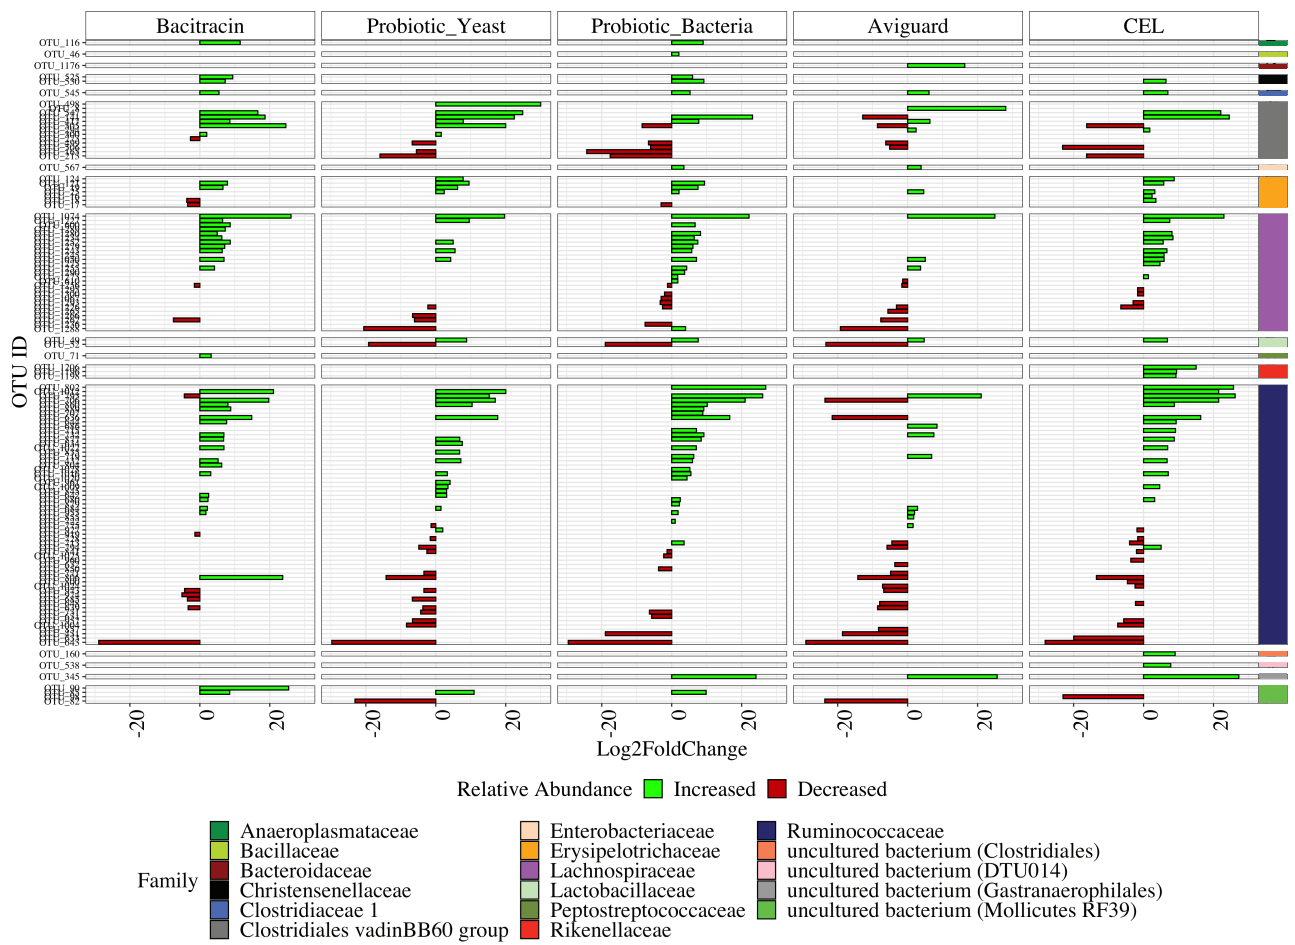

**(B)**

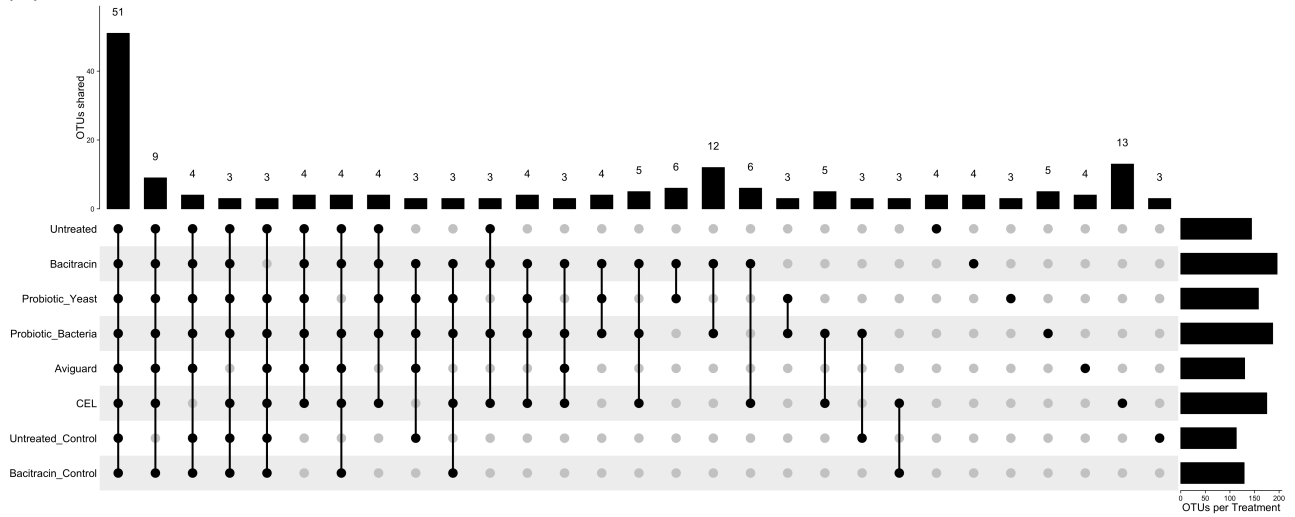

Supplemental Figure 5
